# Supplementary material for: Transfection of Antisense Oligonucleotides Mediated by Cationic Vesicles Based on Non-Ionic Surfactant and Polycations Bearing Quaternary Ammonium Moieties
Source: MDPI journal article supplement (doi:10.3390/ijms18061139), 2017-05-26
Supplement: s1 [file s1]

# Transfection of Antisense Oligonucleotides Mediated by Cationic Vesicles Based on Non-Ionic Surfactant and Polycations Bearing Quaternary Ammonium Moieties

Judith Mayr, Santiago Grijalvo, Jürgen Bachl, Ramon Pons, Ramon Eritja and David Díaz Díaz

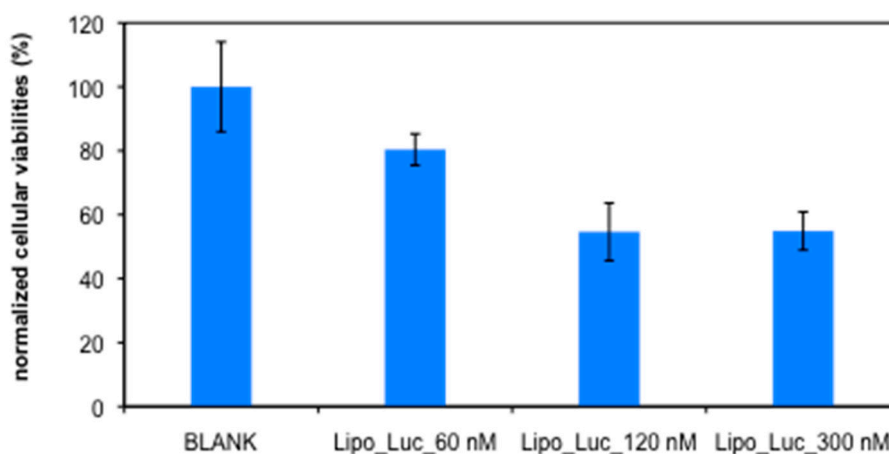

**Figure S1.** Cellular viabilities of preformed lipoplexes made of lipofectamine and *Luc* oligonucleotide at three concentrations (60, 120 and 300 nM, respectively). Each value represents the mean of 6 measurements.

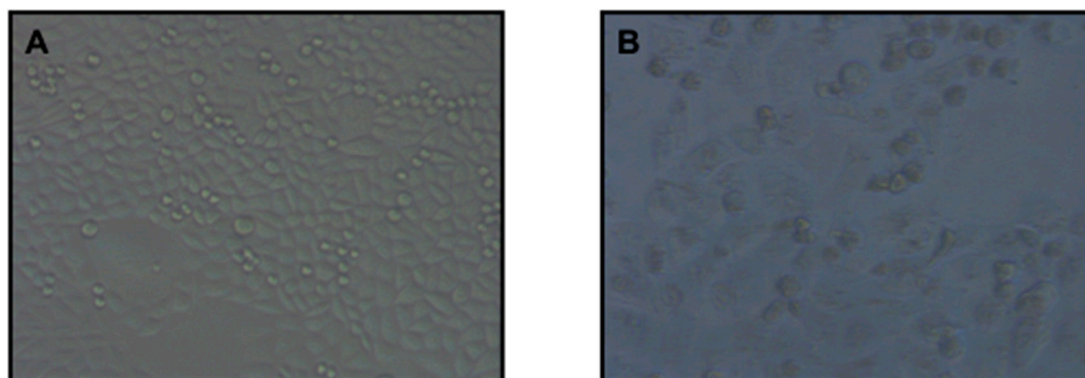

**Figure S2.** HeLa cell images of untreated cells (A) and cells treated with lipoplexes made of lipofectamine and *Luc* oligonucleotide at 300 nM after 18 h incubation (B).

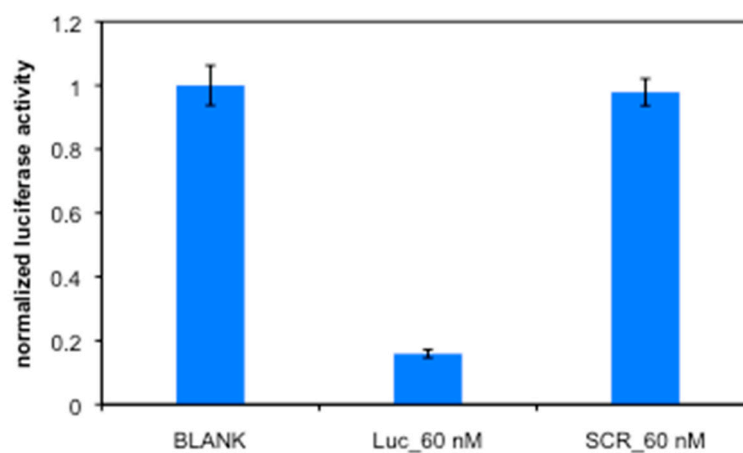

**Figure S3.** Plot of gene-specific antisense activity for *Luc* oligonucleotide at 60 nM in the presence of lipofectamine. Gene-knockdown specificity was confirmed with a scrambled sequence (*Scr*) at 60 nM in the presence of lipofectamine. Transfection experiment was carried out in the presence of formulated liposomes made of *Luc* and the corresponding plasmids *Renilla* and Firefly luciferases. Bars indicate mean  $\pm$  S.D. ( $n = 3$  independent treatments).
